# Supplementary material
Source: publisher figshare collection journal article supplement (https://acs.figshare.com/ndownloader/files/16192061)
Supplement: Supplementary file 1 [file 16192061]

## *Supplementary Material*

### **CO<sub>2</sub> capture by Supported Ionic Liquid Phase (SILP):**

#### **Highlighting the role of the particle size**

Ruben Santiago, Jesus Lemus, Daniel Hospital-Benito, Cristian Moya,  
Jorge Bedia, Noelia Alonso-Morales, Juan J. Rodriguez and Jose Palomar\*

*Chemical Engineering Department. Universidad Autónoma de Madrid. 28049 Madrid.  
Spain*

Number of Pages: 6

Number of Figures: 4

Number of Tables: 2

#### List of Tables and Figures:

|                                                                                                                                                                                                                                                                                     |   |
|-------------------------------------------------------------------------------------------------------------------------------------------------------------------------------------------------------------------------------------------------------------------------------------|---|
| <b>Table S 1:</b> Isotherm models employed in the work.....                                                                                                                                                                                                                         | 2 |
| <b>Table S 2:</b> Additional Aspen Adsorption input required to simulate in dynamic mode. ....                                                                                                                                                                                      | 6 |
| <b>Figure S1:</b> 77K N <sub>2</sub> adsorption/desorption isotherms of empty SiO <sub>2</sub> of three different sizes used in this work .....                                                                                                                                     | 3 |
| <b>Figure S2:</b> TGA analysis of empty silica (SiO <sub>2</sub> ) and SILP [bmim][acetate] of three different particle sizes (SILP 500 – 9 µm). Analysis carried out with a temperature increase of 10 °C·min <sup>-1</sup> under 50 mL·min <sup>-1</sup> of N <sub>2</sub> . .... | 4 |
| <b>Figure S3:</b> Comparison of CO <sub>2</sub> sorption isotherms on SILP of different particle sizes and on neat IL at 299 K. ....                                                                                                                                                | 5 |
| <b>Figure S 4:</b> CO <sub>2</sub> adsorption isotherm of empty SiO <sub>2</sub> -500 µm. ....                                                                                                                                                                                      | 6 |

**Table S 1:** Isotherm models employed in the work

| <b>Isotherm Model</b>      | <b>Equation</b>                                                                                                             | <b><math>R^2</math> coefficient</b> |
|----------------------------|-----------------------------------------------------------------------------------------------------------------------------|-------------------------------------|
| <b>Langmuir</b>            | $w_{CO_2} = \frac{IP_1 \cdot p_{CO_2}}{1 + IP_2 \cdot p_{CO_2}}$                                                            | 0.86-0.87                           |
| <b>Freundlich</b>          | $w_{CO_2} = IP_1 \cdot p_{CO_2}^{IP_2}$                                                                                     | 0.95-0.97                           |
| <b>Langmuir-Freundlich</b> | $w_{CO_2} = \frac{IP_1 \cdot IP_2 \cdot p_{CO_2}^{IP_3} \cdot e^{IP_4/T}}{1 + IP_5 \cdot p_{CO_2}^{IP_3} \cdot e^{IP_6/T}}$ | > 0.99                              |

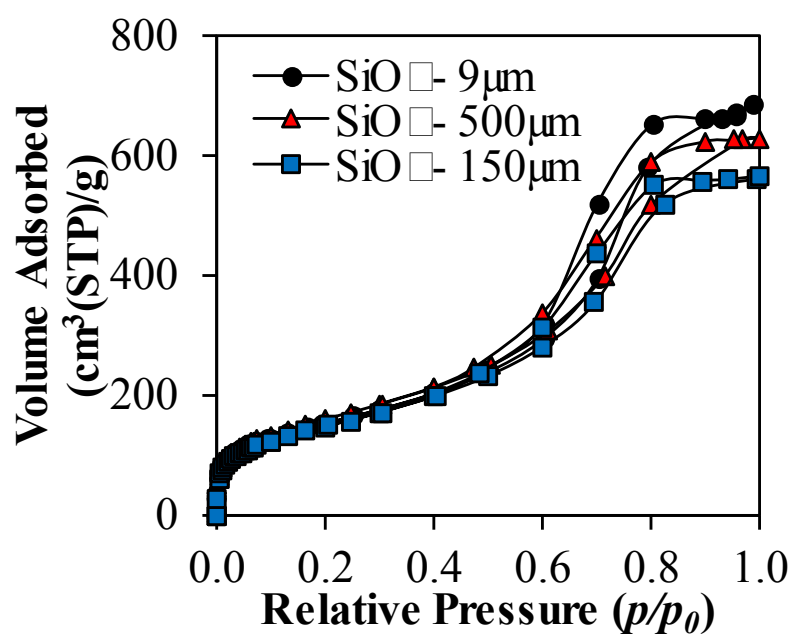

**Figure S1:** 77K N<sub>2</sub> adsorption/desorption isotherms of empty SiO<sub>2</sub> of three different sizes used in this work

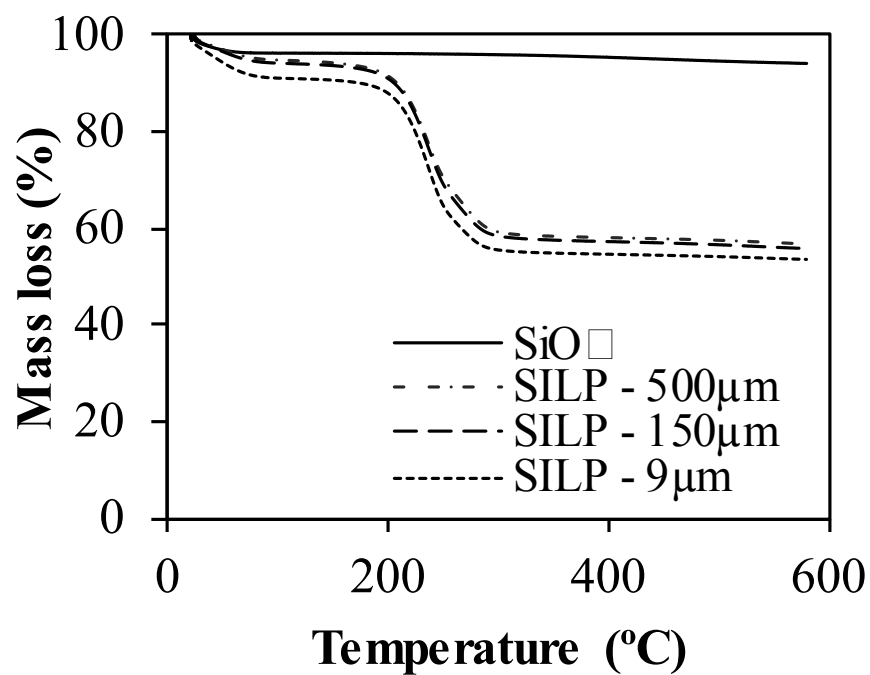

**Figure S2:** TGA analysis of empty silica (SiO<sub>2</sub>) and SILP [bmim][acetate] of three different particle sizes (SILP 500 – 9 μm). Analysis carried out with a temperature increase of 10 °C·min<sup>-1</sup> under 50 mL·min<sup>-1</sup> of N<sub>2</sub>.

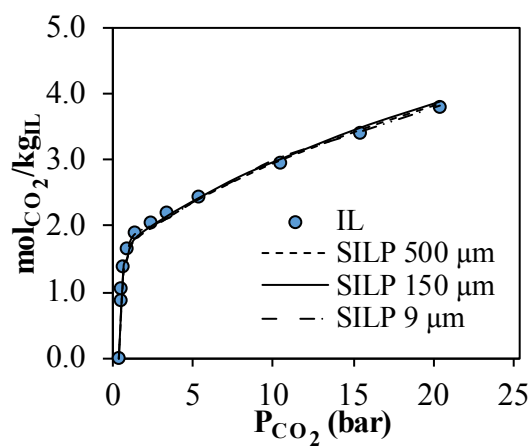

**Figure S3:** Comparison of CO<sub>2</sub> sorption isotherms on SILP of different particle sizes and on neat IL at 299 K.

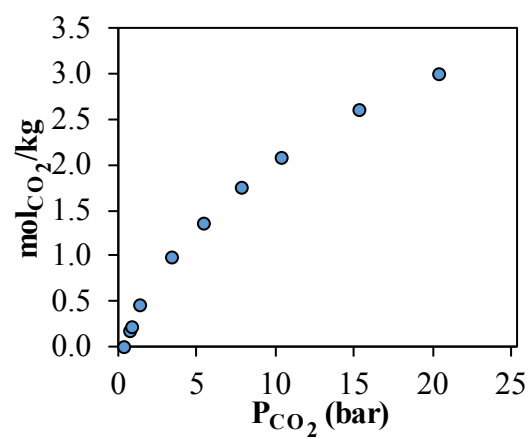

**Figure S 4:** CO<sub>2</sub> adsorption isotherm of empty SiO<sub>2</sub>-500 μm.

**Table S 2:** Additional Aspen Adsorption input required to simulate in dynamic mode.

| <b>Bed characteristics</b>                                       |                                            |
|------------------------------------------------------------------|--------------------------------------------|
| Inter-particle porosity (m <sup>3</sup> void/m <sup>3</sup> bed) | 0.5                                        |
| <b>Sorbent properties</b>                                        |                                            |
| Intra-particle porosity (m <sup>3</sup> void/m <sup>3</sup> bed) | 1·10 <sup>-10</sup>                        |
| Sorbent solid bulk density (kg/m <sup>3</sup> )                  | 810                                        |
| Sorbent particle radius (mm)                                     | 2.5·10 <sup>-7</sup> -1.0·10 <sup>-1</sup> |

The inter-particle porosity was 0.5 in all cases due to the typical ranges in conventional adsorbents, such as zeolites or active carbons [1-3]. Moreover, the expected maximum inter-particle porosity considering spherical adsorbents is 0.6, so a value of 0.5 seems to be reasonably good for the estimations. The intra-particle porosity was 1·10<sup>-10</sup> because the pores of the SiO<sub>2</sub> particles are completely filled of IL (as demonstrated with the textural analysis by means of 77 K N<sub>2</sub> adsorption/desorption isotherms). In Aspen Adsorption, the solid bulk density is referred to the bed apparent density [1], which was experimentally calculated from the experimental fixed-bed tested. The sorbent particle radius was varied from 0.5 – 1000 µm.

## References

1. Bhatt, T.S., et al., *Experimental and Modeling Analysis of Dual-Reflux Pressure Swing Adsorption Process*. Industrial & Engineering Chemistry Research, 2014. **53**(34): p. 13448-13458.
2. Webley, P.A., et al., *A New Multi-bed Vacuum Swing Adsorption Cycle for CO<sub>2</sub> Capture from Flue Gas Streams*. Energy Procedia, 2017. **114**: p. 2467-2480.
3. Hauchhum, S., P. Mahanta, and J. De Wilde, *Capture of CO<sub>2</sub> from Flue Gas onto Coconut Fibre-Based Activated Carbon and Zeolites in a Fixed Bed*. Vol. 110. 2015.
